# Supplementary material for: Chromosomal coharboring of blaIMP-60 and mcr-9 in Enterobacter asburiae isolated from a Japanese woman with empyema: a case report
Source: Springer Nature journal article supplement (doi:10.1186/s12879-022-07730-7), 2022-09-30
Supplement: MOESM1 [file 23558606]

®  
E  
CO

256  
192  
128  
96  
64  
48  
32  
24  
16  
12  
8  
6  
4  
3  
2  
1.5  
1.0  
.75  
.50  
.38  
.25  
.19  
.125  
.094  
.064  
.047  
.032  
.023  
.016

60
