# Supplementary material for: Chromosomal coharboring of blaIMP-60 and mcr-9 in Enterobacter asburiae isolated from a Japanese woman with empyema: a case report
Source: Springer Nature journal article supplement (doi:10.1186/s12879-022-07730-7), 2022-09-30

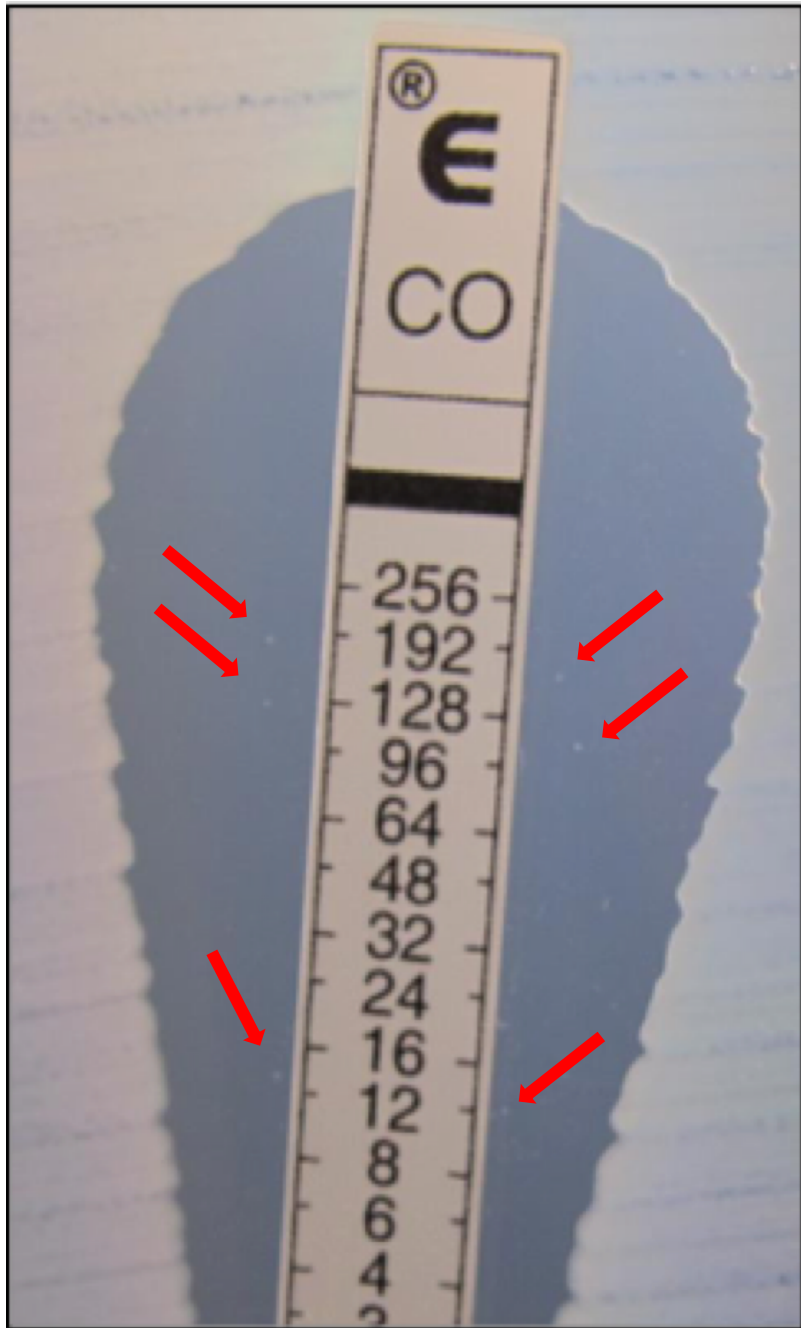

Supplement: MOESM2 [file 23558606]
